# Supplementary material for: Selective electrochemical CO2 conversion to multicarbon alcohols on highly efficient N-doped porous carbon-supported Cu catalysts
Source: Royal Society of Chemistry journal article supplement (doi:10.1039/c9gc03088c), 2019-10-07
Supplement: c9gc03088c1.pdf [file c9gc03088c1.pdf]

## Supporting Information

# Selective Electrochemical CO<sub>2</sub> Conversions to Multicarbon Alcohols on Highly Efficient N- doped Porous Carbon-supported Cu Catalysts

*Hyunsu Han<sup>a</sup>, Yuseong Noh<sup>a</sup>, Yoongon Kim<sup>a</sup>, Seongmin Park<sup>a</sup>, Wongeun Yoon<sup>a</sup>, Daehee Jang<sup>a</sup>, Sung Mook Choi<sup>b</sup> and Won Bae Kim<sup>a\*</sup>*

<sup>a</sup> Department of Chemical Engineering, Pohang University of Science and Technology (POSTECH), 77 Cheongam-ro, Nam-gu, Pohang, Gyeongbuk, 37673, Republic of Korea

<sup>b</sup> Materials Center for Energy Department, Surface Technology Division, Korea Institute of Materials Science, Changwon, 642831, Republic of Korea

---

\* Corresponding author  
Tel: 82-54-279-2397  
Fax: 82-54-279-5528  
E-Mail: [kimwb@postech.ac.kr](mailto:kimwb@postech.ac.kr)

**Table S1.** Textural properties of various carbon materials.

| Samples | BET surface area<br>(m <sup>2</sup> g <sup>-1</sup> ) | Total pore<br>volume<br>(cm <sup>3</sup> g <sup>-1</sup> ) | Micropore<br>volume<br>(cm <sup>3</sup> g <sup>-1</sup> ) | Meso-Macro<br>pore volume<br>(cm <sup>3</sup> g <sup>-1</sup> ) |
|---------|-------------------------------------------------------|------------------------------------------------------------|-----------------------------------------------------------|-----------------------------------------------------------------|
| PC      | 684                                                   | 0.59                                                       | 0.36                                                      | 0.23                                                            |
| NPC-700 | 661                                                   | 0.61                                                       | 0.37                                                      | 0.24                                                            |
| NPC-800 | 651                                                   | 0.58                                                       | 0.38                                                      | 0.20                                                            |
| NPC-900 | 634                                                   | 0.55                                                       | 0.33                                                      | 0.22                                                            |

**Table S2.** Chemical compositions and CO<sub>2</sub> uptake of various carbon materials.

| Samples | N (at. %) | Graphitic N<br>(%) | Pyridinic N<br>(%) | Oxidized N<br>(%) | Pyrrolic N<br>(%) | CO <sub>2</sub> uptake<br>(mmol g <sup>-1</sup> ) |
|---------|-----------|--------------------|--------------------|-------------------|-------------------|---------------------------------------------------|
| PC      | -         | -                  | -                  | -                 | -                 | 0.45                                              |
| NPC-700 | 11.2      | 35.5               | 26.7               | 10.5              | 27.3              | 1.62                                              |
| NPC-800 | 10.9      | 38.8               | 37.5               | 9.6               | 14.1              | 2.26                                              |
| NPC-900 | 9.6       | 46.9               | 24.9               | 20.9              | 7.3               | 1.20                                              |

**Table S3.** Contents of total N with various N species of Cu/NPC hybrid catalysts.

| Samples    | N (at. %) <sup>a</sup> | Graphitic N (%) | Pyridinic N (%) | Oxidized N (%) | Pyrrolic N (%) |
|------------|------------------------|-----------------|-----------------|----------------|----------------|
| Cu/NPC-700 | 8.5                    | 29.1            | 30.5            | 11.6           | 28.8           |
| Cu/NPC-800 | 8.4                    | 32.7            | 40.8            | 10.6           | 15.9           |
| Cu/NPC-900 | 7.1                    | 40.3            | 27.9            | 22.1           | 9.7            |

<sup>a</sup> determined by XPS analysis.

**Table S4.** Cu particle sizes, Cu contents and analytical results of the Cu 2p<sub>3/2</sub> spectra of Cu/PC and Cu/NPC hybrid catalysts.

| Samples    | Cu (wt. %) <sup>a</sup> | Average particle size (nm) <sup>b</sup> | Binding energy (eV) <sup>c</sup>  |
|------------|-------------------------|-----------------------------------------|-----------------------------------|
|            |                         |                                         | Cu <sup>0</sup> + Cu <sup>+</sup> |
| Cu/PC      | 21.6                    | 12.1                                    | 932.2                             |
| Cu/NPC-700 | 19.7                    | 5.3                                     | 932.6                             |
| Cu/NPC-800 | 19.8                    | 5.2                                     | 932.7                             |
| Cu/NPC-900 | 20.2                    | 5.4                                     | 932.6                             |

<sup>a</sup> determined by ICP spectrometer.

<sup>b</sup> determined by TEM.

<sup>c</sup> determined by XPS analysis.

**Table S5.** Chemical compositions of Cu/NPC hybrid catalysts obtained by the linear combination of XANES spectra.

| Samples    | Cu <sup>0</sup> | Cu <sup>+</sup> | Cu <sup>2+</sup> |
|------------|-----------------|-----------------|------------------|
| Cu/PC      | 0.871           | 0.073           | 0.056            |
| Cu/NPC-700 | 0.721           | 0.147           | 0.132            |
| Cu/NPC-800 | 0.716           | 0.159           | 0.125            |
| Cu/NPC-900 | 0.727           | 0.142           | 0.131            |

**Table S6.** Average Faradaic efficiencies (%) of products obtained from electrocatalytic CO<sub>2</sub> reduction on PC and NPC materials at different potentials.

| PC           |                   |       |                               |                                  |                                  |                |                                                                |       |
|--------------|-------------------|-------|-------------------------------|----------------------------------|----------------------------------|----------------|----------------------------------------------------------------|-------|
| E (V vs RHE) | CO                | HCOOH | C <sub>2</sub> H <sub>4</sub> | C <sub>2</sub> H <sub>5</sub> OH | C <sub>3</sub> H <sub>7</sub> OH | H <sub>2</sub> | Etc. (CH <sub>3</sub> CHO,CH <sub>3</sub> CH <sub>2</sub> CHO) | Total |
| -0.6         | N.D. <sup>a</sup> | N.D.  | N.D.                          | N.D.                             | N.D.                             | 98.4           | N.D.                                                           | 98.4  |
| -0.7         | N.D.              | N.D.  | N.D.                          | N.D.                             | N.D.                             | 97             | N.D.                                                           | 97    |
| -0.8         | N.D.              | N.D.  | N.D.                          | N.D.                             | N.D.                             | 98.2           | N.D.                                                           | 98.2  |
| -0.9         | N.D.              | 1.1   | N.D.                          | N.D.                             | N.D.                             | 96.3           | N.D.                                                           | 97.4  |
| -1.0         | N.D.              | 2     | N.D.                          | N.D.                             | N.D.                             | 95.1           | N.D.                                                           | 97.1  |
| -1.05        | N.D.              | 0.8   | N.D.                          | N.D.                             | N.D.                             | 97             | N.D.                                                           | 97.8  |
| -1.1         | N.D.              | N.D.  | N.D.                          | N.D.                             | N.D.                             | 98.2           | N.D.                                                           | 98.2  |
| NPC-700      |                   |       |                               |                                  |                                  |                |                                                                |       |
| E (V vs RHE) | CO                | HCOOH | C <sub>2</sub> H <sub>4</sub> | C <sub>2</sub> H <sub>5</sub> OH | C <sub>3</sub> H <sub>7</sub> OH | H <sub>2</sub> | Etc. (CH <sub>3</sub> CHO,CH <sub>3</sub> CH <sub>2</sub> CHO) | Total |
| -0.6         | 34.8              | N.D.  | N.D.                          | N.D.                             | N.D.                             | 61.9           | N.D.                                                           | 96.7  |
| -0.7         | 40.3              | 3.2   | N.D.                          | N.D.                             | N.D.                             | 53.8           | N.D.                                                           | 97.3  |
| -0.8         | 42.6              | 4.7   | N.D.                          | N.D.                             | N.D.                             | 50.9           | N.D.                                                           | 98.2  |
| -0.9         | 48.8              | 5.7   | N.D.                          | N.D.                             | N.D.                             | 43.2           | N.D.                                                           | 97.7  |
| -1.0         | 50.8              | 6     | N.D.                          | N.D.                             | N.D.                             | 40.8           | N.D.                                                           | 97.6  |
| -1.05        | 50.5              | 4.1   | N.D.                          | N.D.                             | N.D.                             | 44.3           | N.D.                                                           | 98.9  |
| -1.1         | 49.7              | 2.7   | N.D.                          | N.D.                             | N.D.                             | 45.8           | N.D.                                                           | 98.2  |
| NPC-800      |                   |       |                               |                                  |                                  |                |                                                                |       |
| E (V vs RHE) | CO                | HCOOH | C <sub>2</sub> H <sub>4</sub> | C <sub>2</sub> H <sub>5</sub> OH | C <sub>3</sub> H <sub>7</sub> OH | H <sub>2</sub> | Etc. (CH <sub>3</sub> CHO,CH <sub>3</sub> CH <sub>2</sub> CHO) | Total |
| -0.6         | 48.7              | N.D.  | N.D.                          | N.D.                             | N.D.                             | 49.5           | N.D.                                                           | 98.2  |
| -0.7         | 50.0              | 1.5   | N.D.                          | N.D.                             | N.D.                             | 45.6           | N.D.                                                           | 97.1  |
| -0.8         | 56.6              | 2.7   | N.D.                          | N.D.                             | N.D.                             | 38.1           | N.D.                                                           | 97.4  |
| -0.9         | 59.1              | 3.7   | N.D.                          | N.D.                             | N.D.                             | 36.2           | N.D.                                                           | 99    |
| -1.0         | 61.8              | 4.6   | N.D.                          | N.D.                             | N.D.                             | 30.7           | N.D.                                                           | 97.1  |
| -1.05        | 61.3              | 3.4   | N.D.                          | N.D.                             | N.D.                             | 32.7           | N.D.                                                           | 97.4  |
| -1.1         | 60.1              | 1.6   | N.D.                          | N.D.                             | N.D.                             | 36.4           | N.D.                                                           | 98.1  |
| NPC-900      |                   |       |                               |                                  |                                  |                |                                                                |       |
| E (V vs RHE) | CO                | HCOOH | C <sub>2</sub> H <sub>4</sub> | C <sub>2</sub> H <sub>5</sub> OH | C <sub>3</sub> H <sub>7</sub> OH | H <sub>2</sub> | Etc. (CH <sub>3</sub> CHO,CH <sub>3</sub> CH <sub>2</sub> CHO) | Total |
| -0.6         | 30.5              | N.D.  | N.D.                          | N.D.                             | N.D.                             | 68.2           | N.D.                                                           | 98.7  |
| -0.7         | 31.7              | 5.5   | N.D.                          | N.D.                             | N.D.                             | 59.5           | N.D.                                                           | 96.7  |
| -0.8         | 33.2              | 5.8   | N.D.                          | N.D.                             | N.D.                             | 57.8           | N.D.                                                           | 96.8  |
| -0.9         | 37.8              | 7.7   | N.D.                          | N.D.                             | N.D.                             | 51.6           | N.D.                                                           | 97.1  |
| -1.0         | 41.6              | 8.9   | N.D.                          | N.D.                             | N.D.                             | 47.8           | N.D.                                                           | 98.3  |
| -1.05        | 41.9              | 6.2   | N.D.                          | N.D.                             | N.D.                             | 50.6           | N.D.                                                           | 98.7  |
| -1.1         | 39.7              | 3.1   | N.D.                          | N.D.                             | N.D.                             | 54.8           | N.D.                                                           | 97.6  |

<sup>a</sup> N.D. – Not detected. This is also applicable to Table S6-S7 and Table S10.

**Table S7.** Average Faradaic efficiencies (%) of products obtained from electrocatalytic CO<sub>2</sub> reduction on Cu/PC and Cu/NPC hybrid catalysts at different potentials.

| Cu/PC        |      |       |                               |                                  |                                  |                |                                                                 |       |
|--------------|------|-------|-------------------------------|----------------------------------|----------------------------------|----------------|-----------------------------------------------------------------|-------|
| E (V vs RHE) | CO   | HCOOH | C <sub>2</sub> H <sub>4</sub> | C <sub>2</sub> H <sub>5</sub> OH | C <sub>3</sub> H <sub>7</sub> OH | H <sub>2</sub> | Etc. (CH <sub>3</sub> CHO, CH <sub>3</sub> CH <sub>2</sub> CHO) | Total |
| -0.6         | 7.4  | 10.1  | 12.3                          | 3.1                              | N.D.                             | 65.0           | N.D.                                                            | 97.9  |
| -0.7         | 5.1  | 8.5   | 19.7                          | 5.6                              | N.D.                             | 58.7           | N.D.                                                            | 97.6  |
| -0.8         | 4.1  | 6.3   | 22.1                          | 12.8                             | 0.5                              | 52.5           | 0.5                                                             | 98.8  |
| -0.9         | 3.2  | 5.4   | 24.5                          | 17.3                             | 0.9                              | 49.1           | 0.3                                                             | 100.7 |
| -1.0         | 1.8  | 3.1   | 28.2                          | 13.5                             | 2.1                              | 49.6           | N.D.                                                            | 98.3  |
| -1.05        | 1.1  | 1.8   | 30.7                          | 10.5                             | 1.1                              | 52.6           | 0.2                                                             | 98.0  |
| -1.1         | 0.5  | 0.3   | 30.4                          | 9.7                              | 0.4                              | 56.4           | N.D.                                                            | 97.7  |
| Cu/NPC-700   |      |       |                               |                                  |                                  |                |                                                                 |       |
| E (V vs RHE) | CO   | HCOOH | C <sub>2</sub> H <sub>4</sub> | C <sub>2</sub> H <sub>5</sub> OH | C <sub>3</sub> H <sub>7</sub> OH | H <sub>2</sub> | Etc. (CH <sub>3</sub> CHO, CH <sub>3</sub> CH <sub>2</sub> CHO) | Total |
| -0.6         | 20.5 | N.D.  | N.D.                          | 29.6                             | 0.5                              | 46.6           | 1.5                                                             | 98.7  |
| -0.7         | 17.4 | N.D.  | 2                             | 33.1                             | 0.8                              | 45.1           | 1.4                                                             | 99.8  |
| -0.8         | 16.5 | N.D.  | 2.6                           | 40.1                             | 1.3                              | 38.9           | 1.1                                                             | 100.5 |
| -0.9         | 12.3 | N.D.  | 2.9                           | 43.5                             | 2.4                              | 37.1           | 0.7                                                             | 98.9  |
| -1.0         | 11.5 | N.D.  | 3.4                           | 45.2                             | 4.2                              | 33.1           | 0.8                                                             | 98.2  |
| -1.05        | 4.3  | N.D.  | 5.1                           | 50.3                             | 6.1                              | 33.6           | 0.3                                                             | 99.7  |
| -1.1         | 3.7  | N.D.  | 6.8                           | 45.5                             | 4.1                              | 38.3           | 0.4                                                             | 98.8  |
| Cu/NPC-800   |      |       |                               |                                  |                                  |                |                                                                 |       |
| E (V vs RHE) | CO   | HCOOH | C <sub>2</sub> H <sub>4</sub> | C <sub>2</sub> H <sub>5</sub> OH | C <sub>3</sub> H <sub>7</sub> OH | H <sub>2</sub> | Etc. (CH <sub>3</sub> CHO, CH <sub>3</sub> CH <sub>2</sub> CHO) | Total |
| -0.6         | 29.5 | N.D.  | N.D.                          | 37.6                             | 0.9                              | 30             | 1.8                                                             | 99.8  |
| -0.7         | 26.7 | N.D.  | N.D.                          | 46                               | 1.3                              | 23.8           | 1.7                                                             | 99.5  |
| -0.8         | 21.0 | N.D.  | 1.8                           | 51.4                             | 2.0                              | 22.2           | 1.4                                                             | 99.8  |
| -0.9         | 17.9 | N.D.  | 2.1                           | 55.3                             | 4.3                              | 17.6           | 1.3                                                             | 98.5  |
| -1.0         | 15.4 | N.D.  | 2.9                           | 58.8                             | 6.2                              | 13.2           | 0.8                                                             | 97.3  |
| -1.05        | 7.1  | N.D.  | 3.6                           | 64.6                             | 8.7                              | 14.8           | 0.6                                                             | 99.4  |
| -1.1         | 6.9  | N.D.  | 4.4                           | 60.1                             | 5.5                              | 19.7           | 0.6                                                             | 97.2  |
| Cu/NPC-900   |      |       |                               |                                  |                                  |                |                                                                 |       |
| E (V vs RHE) | CO   | HCOOH | C <sub>2</sub> H <sub>4</sub> | C <sub>2</sub> H <sub>5</sub> OH | C <sub>3</sub> H <sub>7</sub> OH | H <sub>2</sub> | Etc. (CH <sub>3</sub> CHO, CH <sub>3</sub> CH <sub>2</sub> CHO) | Total |
| -0.6         | 15.5 | N.D.  | N.D.                          | 26.8                             | 0.3                              | 54.6           | 1.2                                                             | 98.4  |
| -0.7         | 12.6 | N.D.  | 3.2                           | 29.7                             | 0.5                              | 51.8           | 1.1                                                             | 98.9  |
| -0.8         | 10.5 | N.D.  | 3.8                           | 35.8                             | 0.9                              | 47.5           | 0.8                                                             | 99.3  |
| -0.9         | 8.4  | N.D.  | 4.7                           | 38.9                             | 1.4                              | 44.6           | 0.6                                                             | 98.6  |
| -1.0         | 6.5  | N.D.  | 6.6                           | 40.5                             | 2.7                              | 41.1           | 0.6                                                             | 97.4  |
| -1.05        | 2.1  | N.D.  | 7.3                           | 44.4                             | 4.3                              | 42.1           | 0.1                                                             | 100.3 |
| -1.1         | 1.5  | N.D.  | 9.2                           | 39.5                             | 2.3                              | 45.6           | 0.2                                                             | 98.3  |

**Table S8.** Comparison of multicarbon product formation from various Cu-based catalysts.

| Catalyst                                               | Electrolyte                | V (vs RHE)/<br>$j_{\text{total}}$ (mA cm <sup>-2</sup> ) | C2-C3 product (Faradaic efficiency, %)                                                                                                                                                                                     | Ref.      |
|--------------------------------------------------------|----------------------------|----------------------------------------------------------|----------------------------------------------------------------------------------------------------------------------------------------------------------------------------------------------------------------------------|-----------|
| Cu/NPC-800                                             | 0.2 M<br>KHCO <sub>3</sub> | -1.05/12.6                                               | C <sub>2</sub> H <sub>4</sub> (3.6%), C <sub>2</sub> H <sub>5</sub> OH (64.6%), C <sub>3</sub> H <sub>7</sub> OH (8.7%)                                                                                                    | This work |
| Cu foil                                                | 0.1 M<br>KHCO <sub>3</sub> | -1.05/5.8                                                | C2-C3 products (40.6%)<br>C <sub>2</sub> H <sub>4</sub> (26%), C <sub>2</sub> H <sub>5</sub> OH (9.8%), C <sub>3</sub> H <sub>7</sub> OH (2.5%)                                                                            | S1        |
| Cu <sub>2</sub> O derived<br>Cu with PdCl <sub>2</sub> | 0.1 M<br>KHCO <sub>3</sub> | -1.0/19.5                                                | C <sub>2</sub> H <sub>6</sub> (30.1%), C <sub>2</sub> H <sub>5</sub> OH (11.1%), C <sub>3</sub> H <sub>7</sub> OH (5.5%)                                                                                                   | S2        |
| Cl-induced<br>Cu <sub>2</sub> O-Cu                     | 0.1 M<br>KCl               | -1.8/7.7                                                 | C2-C4 products (55.1%)<br>C <sub>2</sub> H <sub>4</sub> (23%), C <sub>2</sub> H <sub>5</sub> OH (20%), C <sub>3</sub> H <sub>7</sub> OH (7.8%),<br>C <sub>3</sub> H <sub>8</sub> (1%), C <sub>4</sub> H <sub>10</sub> (1%) | S3        |
| Nanostructured<br>polycrystalline<br>Cu (KF cycled)    | 0.1 M<br>KHCO <sub>3</sub> | -1.0/6.5                                                 | C2-C3 products (28%)<br>C <sub>2</sub> H <sub>4</sub> (16.3%), C <sub>2</sub> H <sub>5</sub> OH (7.85%), C <sub>3</sub> H <sub>7</sub> OH (3.08%)                                                                          | S4        |
| Cu oxide film<br>(1.7 μm)                              | 0.1 M<br>KHCO <sub>3</sub> | -0.99/30                                                 | C <sub>2</sub> H <sub>4</sub> (38.79%), C <sub>2</sub> H <sub>5</sub> OH (9.01%)                                                                                                                                           | S5        |
| Oxide-reduced<br>agglomerated<br>Cu<br>nanoparticles   | 0.1 M<br>KHCO <sub>3</sub> | -0.95/19.9                                               | C <sub>2</sub> H <sub>4</sub> (35.82%), C <sub>2</sub> H <sub>5</sub> OH (12.75%),<br>C <sub>3</sub> H <sub>7</sub> OH (8.75%)                                                                                             | S6        |
| Cu <sub>2</sub> O derived<br>Cu films<br>(sample C)    | 0.1 M<br>KHCO <sub>3</sub> | -0.98/26.2                                               | C <sub>2</sub> H <sub>4</sub> (31%), C <sub>2</sub> H <sub>5</sub> OH (7.1%), C <sub>3</sub> H <sub>7</sub> OH (3.7%)                                                                                                      | S7        |
| Cu/N-doped<br>graphene                                 | 0.1 M<br>KHCO <sub>3</sub> | -1.2/1.2                                                 | C <sub>2</sub> H <sub>5</sub> OH (63%)                                                                                                                                                                                     | S8        |
| Single crystals<br>Cu (100)                            | 0.1 M<br>KHCO <sub>3</sub> | -1/5                                                     | C2-C3 products (57.8%)<br>C <sub>2</sub> H <sub>4</sub> (40.4%), C <sub>2</sub> H <sub>5</sub> OH (9.7%), C <sub>3</sub> H <sub>7</sub> OH (1.5%)                                                                          | S9        |
| Cu (711)/<br>[4(100)·(111)]                            | 0.1 M<br>KHCO <sub>3</sub> | -0.94/5                                                  | C2-C3 products (71.5%)<br>C <sub>2</sub> H <sub>4</sub> (50%), C <sub>2</sub> H <sub>5</sub> OH (7.4%), C <sub>3</sub> H <sub>7</sub> OH (4.6%)                                                                            |           |
| CuAu<br>nanowire<br>arrays                             | 0.1 M<br>KHCO <sub>3</sub> | -0.7/1 <sup>a</sup>                                      | C <sub>2</sub> H <sub>5</sub> OH (~ 45%)                                                                                                                                                                                   | 14        |
| AuCu alloy<br>embedded Cu<br>submicrocone              | 0.5 M<br>KHCO <sub>3</sub> | -1/5.6 ± 0.77 <sup>a</sup>                               | C <sub>2</sub> H <sub>4</sub> (16±4%), C <sub>2</sub> H <sub>5</sub> OH (29±4%)                                                                                                                                            | 15        |
| Hydrophobic<br>Cu dendrite                             | 0.1 M KPi                  | -1.3/30                                                  | C <sub>2</sub> H <sub>4</sub> (7.56%), C <sub>2</sub> H <sub>6</sub> (0.05%), C <sub>2</sub> H <sub>5</sub> OH (3.15%),<br>CH <sub>3</sub> COOH (1.37%)                                                                    | 16        |
| Wettable Cu<br>dendrite                                | 0.1 M KPi                  | -0.94/30                                                 | C <sub>2</sub> H <sub>4</sub> (3.61%), C <sub>2</sub> H <sub>6</sub> (0.5%), C <sub>2</sub> H <sub>5</sub> OH (2.21%),<br>CH <sub>3</sub> COOH (0.34%), C <sub>3</sub> H <sub>7</sub> OH (1.37%)                           |           |

<sup>a</sup> Partial current density of C<sub>2</sub>H<sub>5</sub>OH.

## Reference for Table S8.

- [S1] K. P. Kuhl, E. R. Cave, D. N. Abram and T. F. Jaramillo, *Energy Environ. Sci.* 2012, **5**, 7050.
- [S2] C. S. Chen, J. H. Wan and B. S. Yeo, *J. Phys. Chem. C* 2015, **119**, 26875–26882.
- [S3] S. Lee, D. Kim and J. Lee, *Angew. Chem. Int. Ed.* 2015, **54**, 14701–14705.
- [S4] Y. Kwon, Y. Lum, E. L. Clark, J. W. Ager and A. T. Bell, *ChemElectroChem* 2016, **3**, 1012–1019.
- [S5] D. Ren, Y. Deng, A. D. Handoko, C. S. Chen, S. Malkhandi and B. S. Yeo, *ACS Catal.* 2015, **5**, 2814–2821.
- [S6] D. Ren, N. T. Wong, A. D. Handoko, Y. Huang and B. S. Yeo, *J. Phys. Chem. Lett.* 2016, **7**, 20–24.
- [S7] A. D. Handoko, C. W. Ong, Y. Huang, Z. G. Lee, L. Lin, G. B. Panetti and B. S. Yeo, *J. Phys. Chem. C* 2016, **120**, 20058–20067.
- [S8] Y. Song, R. Peng, D. K. Hensley, P. V. Bonnesen, L. Liang, Z. Wu, H. M. Meyer, M. Chi, C. Ma, B. G. Sumpter and A. J. Rondinone, *ChemistrySelect* 2016, **1**, 6055–6061.
- [S9] Y. Hori, I. Takahashi, O. Koga and N. Hoshi, *J. Mol. Catal. Chem.* 2003, **199**, 39–47.



**Table S9.** Physicochemical characterizations of Cu10/NPC-800 and Cu30/NPC-800.

| Samples      | Cu loading (wt. %) <sup>a</sup> | Particle size (nm) <sup>b</sup> | N content (at. %) <sup>c</sup> | Pyridinic N (%) | Binding energy (eV) <sup>c</sup>  |
|--------------|---------------------------------|---------------------------------|--------------------------------|-----------------|-----------------------------------|
|              |                                 |                                 |                                |                 | Cu <sup>0</sup> + Cu <sup>+</sup> |
| Cu10/NPC-800 | 9.4                             | 5.0                             | 9.1                            | 37.6            | 932.5                             |
| Cu30/NPC-800 | 31.7                            | 6.3                             | 5.8                            | 39.3            | 932.7                             |

<sup>a</sup> determined by ICP spectrometer.<sup>b</sup> determined by TEM.<sup>c</sup> determined by XPS analysis.**Table S10.** Average Faradaic efficiencies (%) of products obtained from electrocatalytic CO<sub>2</sub> reduction on Cu10/NPC-800 and Cu30/NPC-800 at different potentials.

| Cu10/NPC-800 |      |       |                               |                                  |                                  |                |                                                                 |       |
|--------------|------|-------|-------------------------------|----------------------------------|----------------------------------|----------------|-----------------------------------------------------------------|-------|
| E (V vs RHE) | CO   | HCOOH | C <sub>2</sub> H <sub>4</sub> | C <sub>2</sub> H <sub>5</sub> OH | C <sub>3</sub> H <sub>7</sub> OH | H <sub>2</sub> | Etc. (CH <sub>3</sub> CHO, CH <sub>3</sub> CH <sub>2</sub> CHO) | Total |
| -0.6         | 39.5 | N.D.  | N.D.                          | 6.5                              | 0.1                              | 51.6           | N.D.                                                            | 97.6  |
| -0.7         | 42.7 | 1.2   | N.D.                          | 8.0                              | 0.2                              | 44.8           | 0.6                                                             | 97.3  |
| -0.8         | 38.6 | 1.4   | N.D.                          | 13.4                             | 0.4                              | 42.1           | 0.5                                                             | 96.4  |
| -0.9         | 35.9 | 2.7   | 1.0                           | 20.3                             | 0.9                              | 36.2           | 0.5                                                             | 97.5  |
| -1.0         | 33.2 | 2.5   | 1.2                           | 25.5                             | 1.3                              | 33.7           | 0.4                                                             | 97.8  |
| -1.05        | 26.5 | 1.2   | 1.7                           | 31.4                             | 2.3                              | 35.4           | 0.2                                                             | 98.7  |
| -1.1         | 24.3 | 1.0   | 2.0                           | 26.6                             | 1.6                              | 42.7           | 0.2                                                             | 98.4  |
| Cu30/NPC-800 |      |       |                               |                                  |                                  |                |                                                                 |       |
| E (V vs RHE) | CO   | HCOOH | C <sub>2</sub> H <sub>4</sub> | C <sub>2</sub> H <sub>5</sub> OH | C <sub>3</sub> H <sub>7</sub> OH | H <sub>2</sub> | Etc. (CH <sub>3</sub> CHO, CH <sub>3</sub> CH <sub>2</sub> CHO) | Total |
| -0.6         | 8.5  | N.D.  | 8.2                           | 18.8                             | 0.2                              | 62.0           | 0.7                                                             | 98.2  |
| -0.7         | 6.7  | N.D.  | 9.6                           | 23.5                             | 0.3                              | 57.8           | 0.6                                                             | 98.5  |
| -0.8         | 5.3  | N.D.  | 12.1                          | 24.1                             | 0.7                              | 55.2           | 0.4                                                             | 97.7  |
| -0.9         | 4.5  | N.D.  | 15.5                          | 29.3                             | 1.0                              | 46.6           | 0.3                                                             | 97.2  |
| -1.0         | 3.3  | N.D.  | 18.8                          | 32.8                             | 1.9                              | 41.2           | 0.3                                                             | 98.3  |
| -1.05        | 0.8  | N.D.  | 19.5                          | 35.6                             | 2.7                              | 41.4           | 0.1                                                             | 100.1 |
| -1.1         | 0.4  | N.D.  | 21.9                          | 31.1                             | 1.8                              | 43.7           | 0.2                                                             | 99.1  |

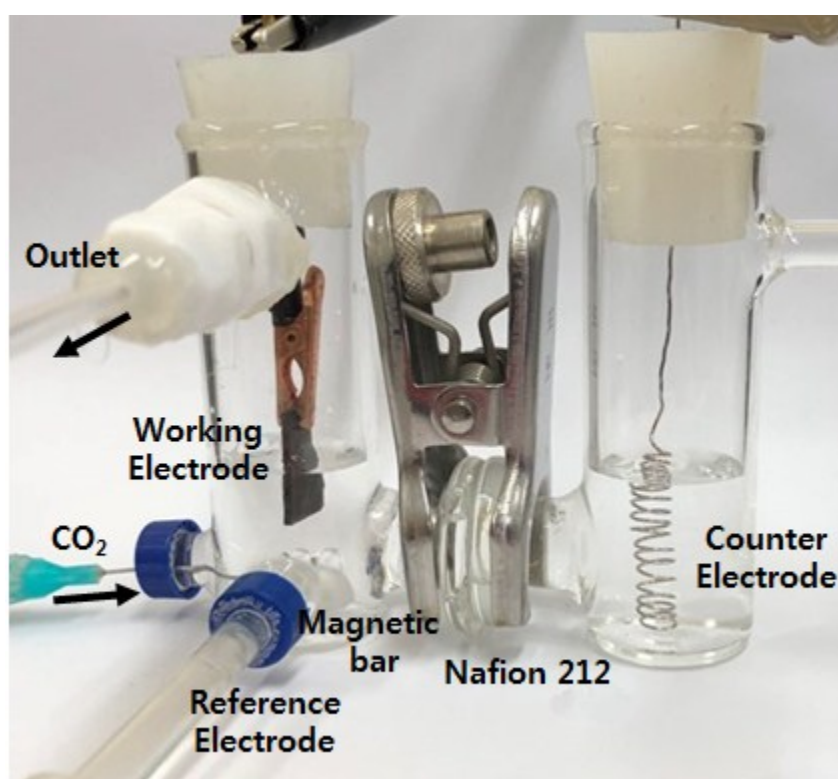

**Fig. S1** Photograph of H-type cell for electrocatalytic CO<sub>2</sub> reduction.

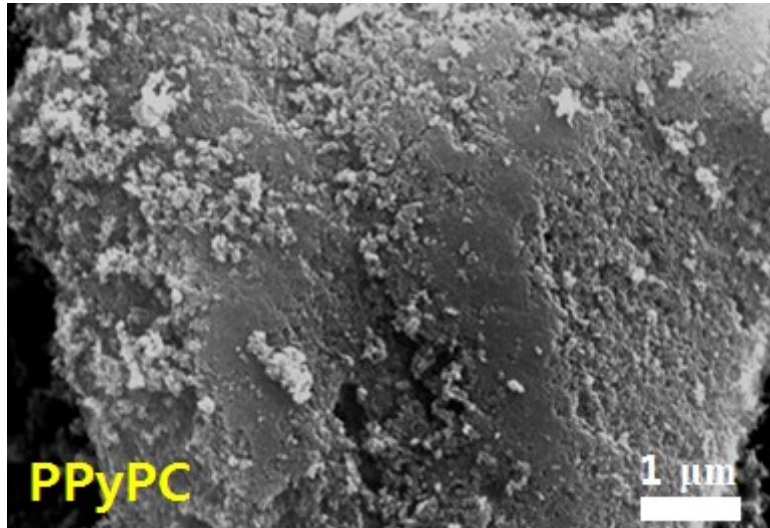

**Fig. S2** SEM  
PPyPC.

images of

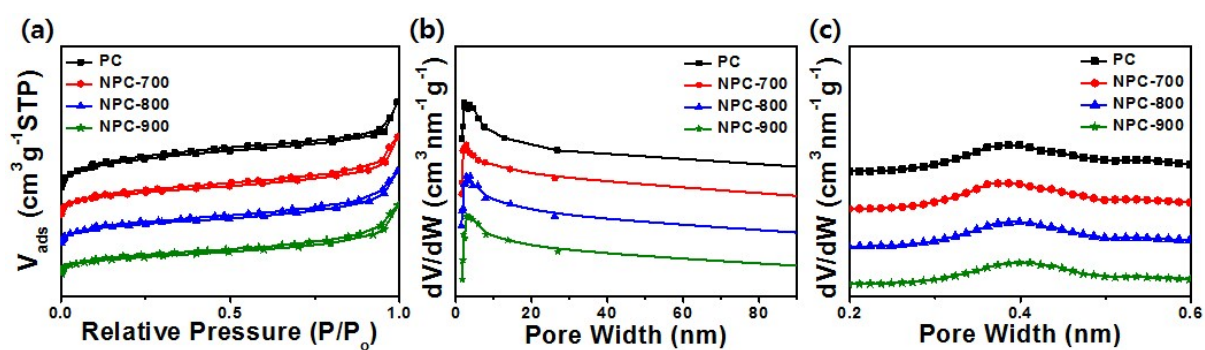

**Fig. S3** (a) N<sub>2</sub> adsorption/desorption isotherms and pore size distributions calculated by (b) Barrett-Joyner-Halenda (BJH) and (c) Horváth-Kawazoe (HK) method for PC, NPC-700, NPC-800 and NPC-900.

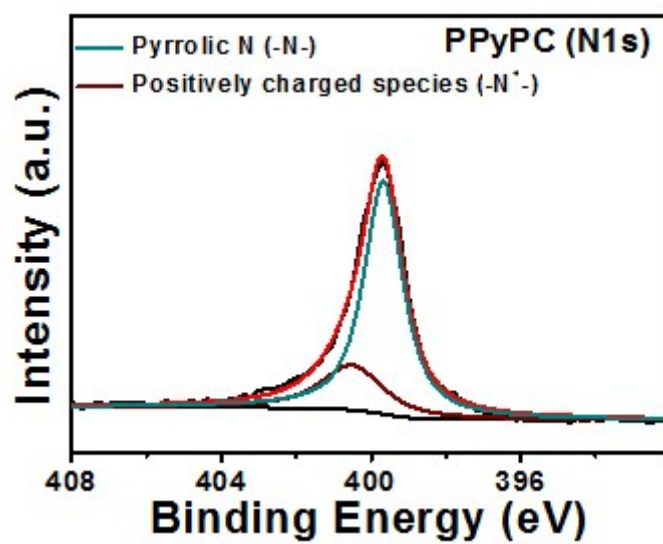

**Fig. S4** High resolution N 1s spectra of PPyPC.

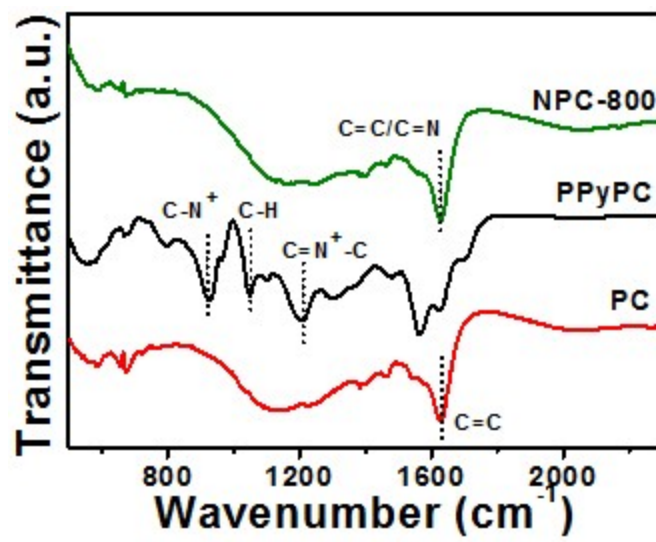

**Fig. S5** FTIR spectroscopy of PC, PPyPC and NPC-800.

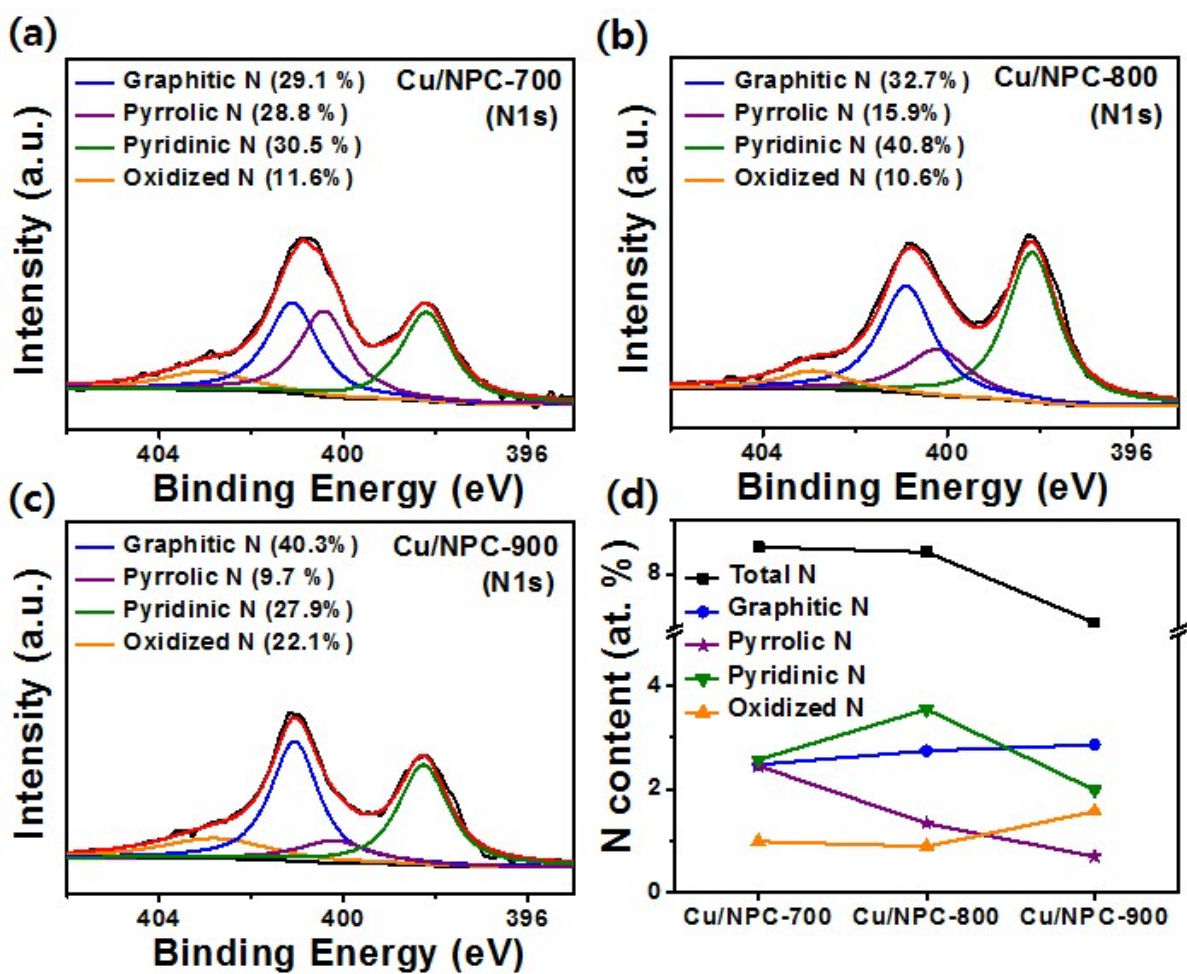

**Fig. S6** High resolution N 1s spectra of (a) Cu/NPC-700, (b) Cu/NPC-800 and (c) Cu/NPC-900. (d) Summary of N atomic contents and relative concentrations.

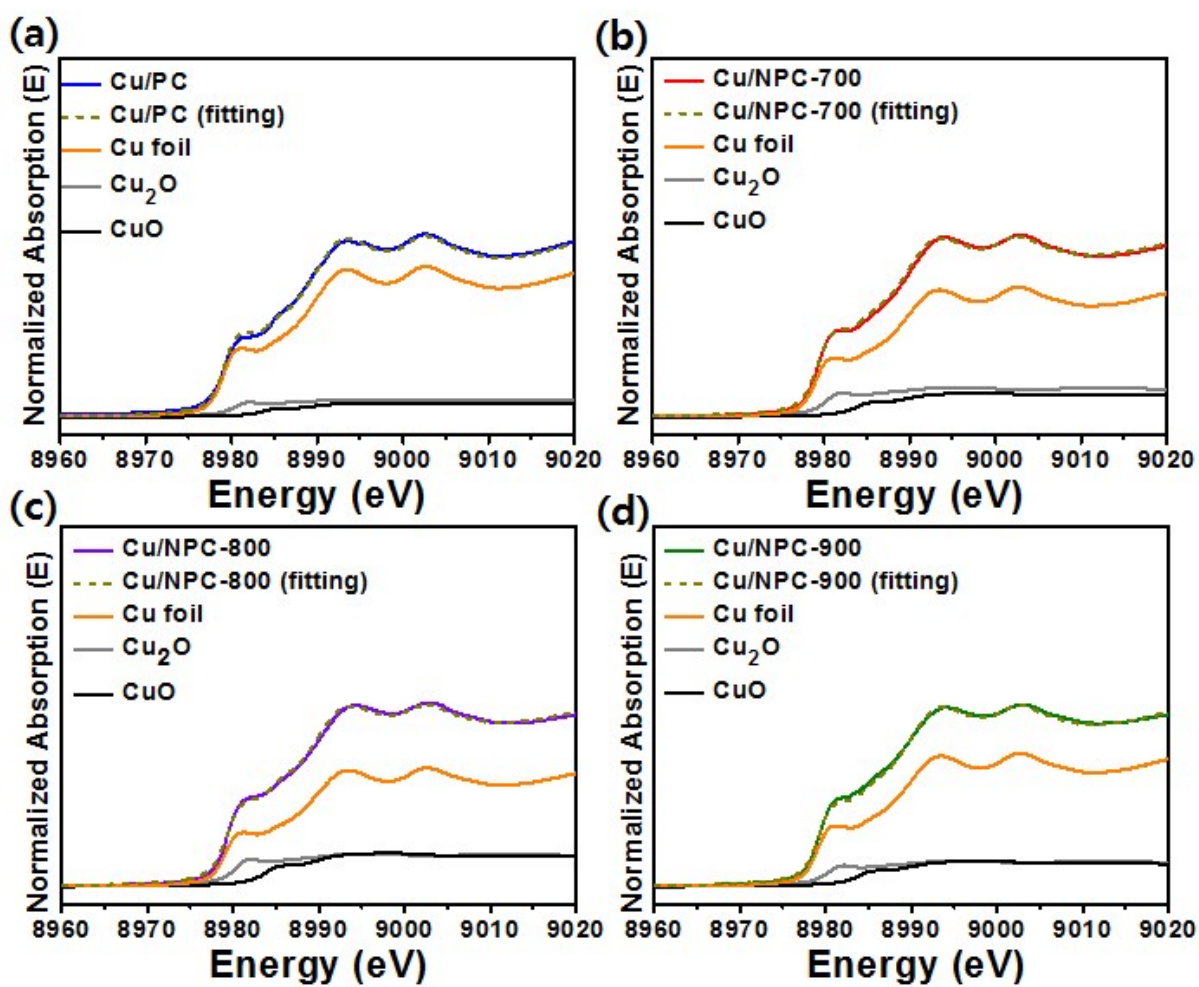

**Fig. S7** Cu K-edge XANES fittings for Cu/PC, Cu/NPC-700, Cu/NPC-800 and Cu/NPC-900 by linear combination fittings (LCF). Dashed line is the fitted result.



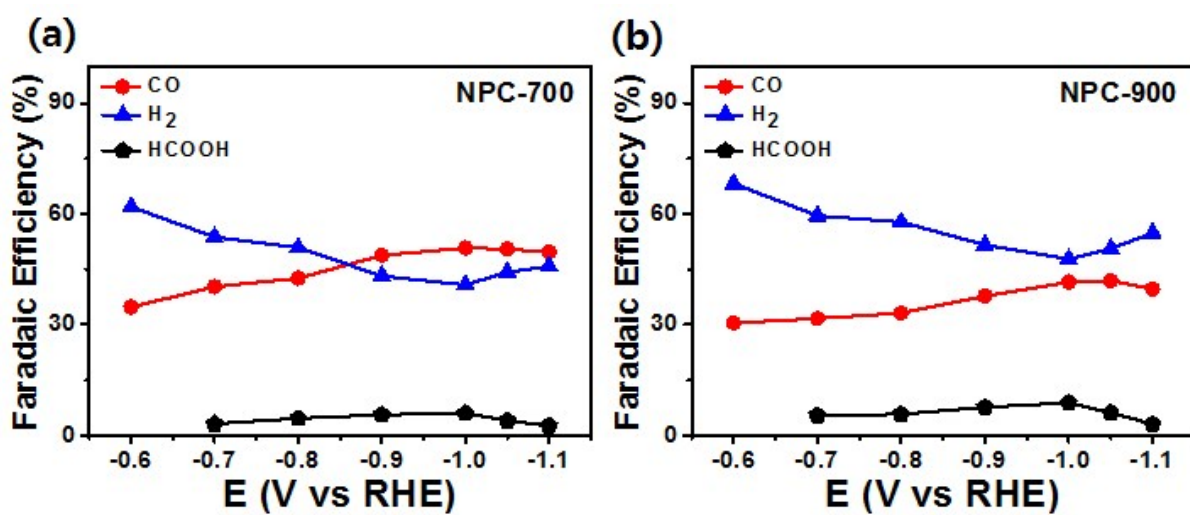

**Fig. S8** Faradaic efficiencies of liquid and gaseous products for CO<sub>2</sub> reduction in CO<sub>2</sub>-saturated 0.2 M KHCO<sub>3</sub> aqueous solution on (a) NPC-700 and (b) NPC-900.

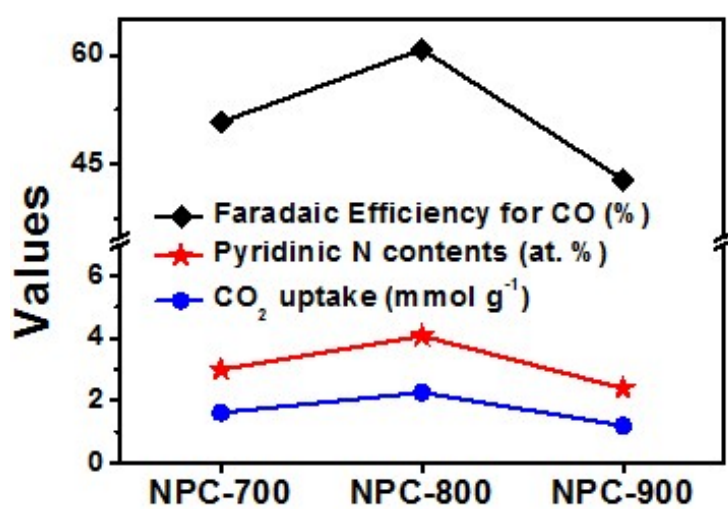

**Fig. S9** Trend in maximum Faradaic efficiency for CO production versus contents of pyridinic N species and CO<sub>2</sub> uptake on NPC-700, NPC-800 and NPC-900.

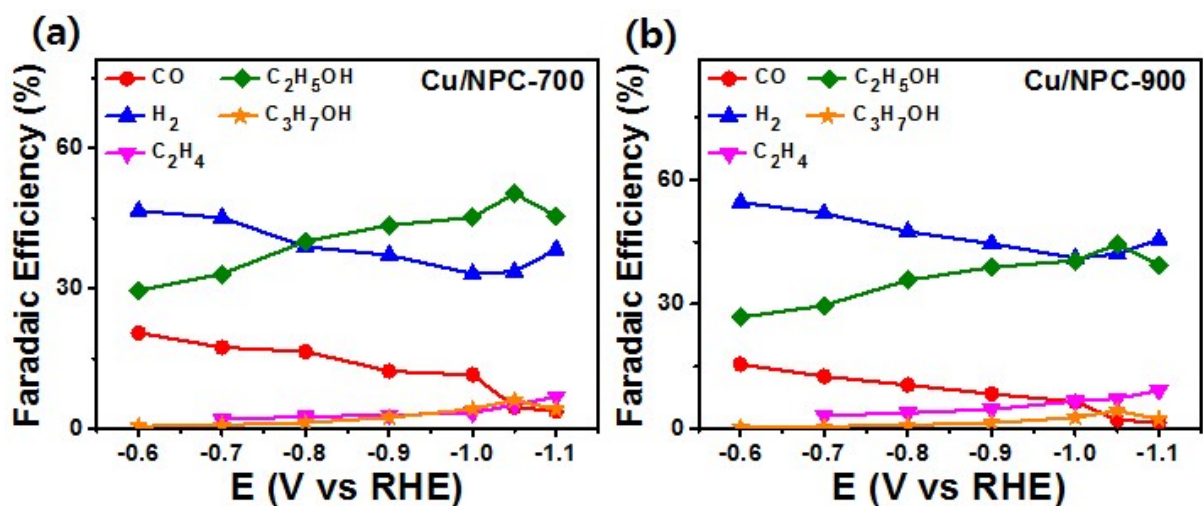

**Fig. S10** Faradaic efficiencies of liquid and gaseous products for CO<sub>2</sub> reduction in CO<sub>2</sub>-saturated 0.2 M KHCO<sub>3</sub> aqueous solution on (a) Cu/NPC-700 and (b) Cu/NPC-900.

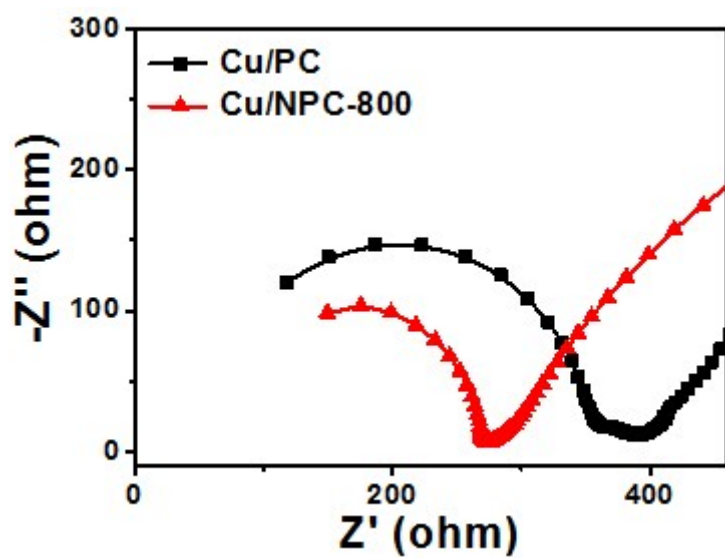

**Fig. S11** EIS results of Cu/PC and Cu/NPC-800 performed in  $\text{CO}_2$ -saturated 0.2 M  $\text{KHCO}_3$  aqueous solution at  $-1.05$  V (vs RHE).

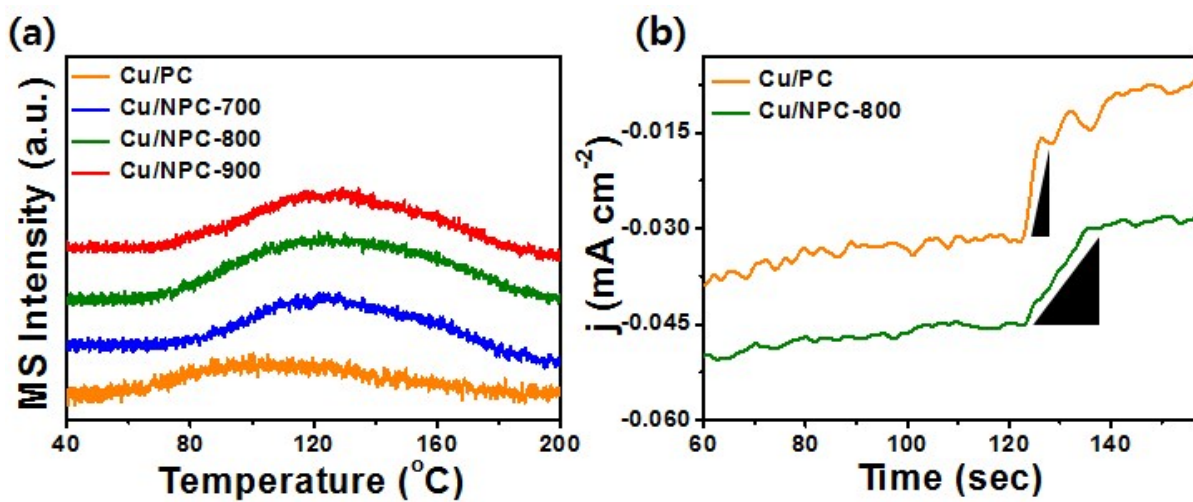

**Fig. S12** Experimental measurements of CO adsorption strength on prepared catalysts. (a) CO-TPD profiles of Cu/PC, Cu/NPC-700, Cu/NPC-800 and Cu/NPC-900 at ramping rate of  $5\text{ }^{\circ}\text{C min}^{-1}$ . (b) Chronoamperometric measurements of Cu/PC and Cu/NPC-800 at constant potential of  $-0.12\text{ V}$  (vs RHE) in  $0.2\text{ M KHCO}_3$  aqueous solution.

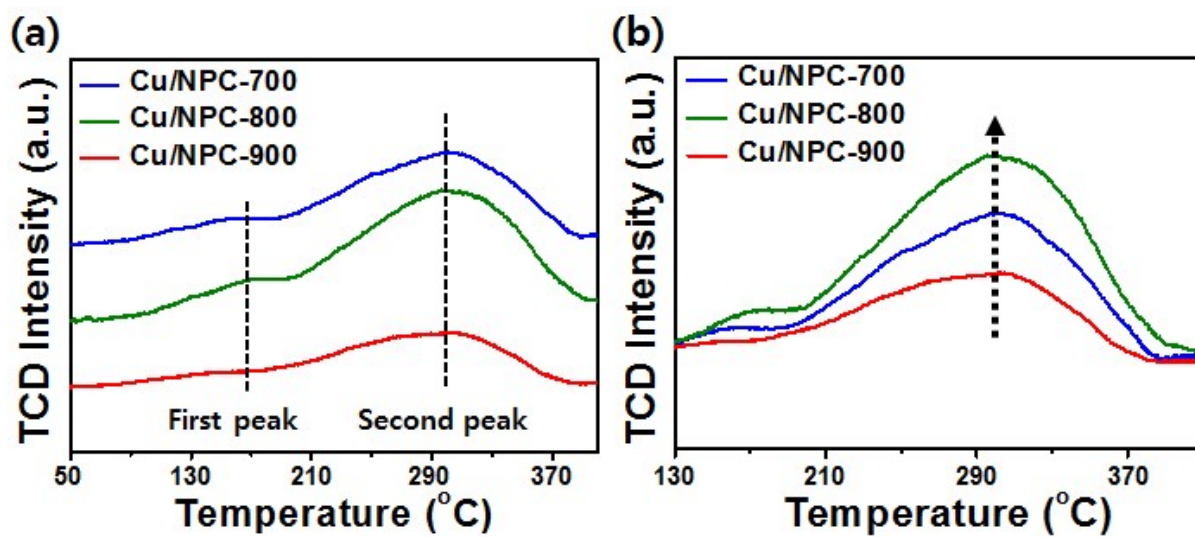

**Fig. S13** (a) CO<sub>2</sub>-TPD profiles of Cu/NPC-700, Cu/NPC-800 and Cu/NPC-900 measured at ramping rate of 10 °C min<sup>-1</sup> and (b) the peak comparison of CO<sub>2</sub>-TPD profiles.

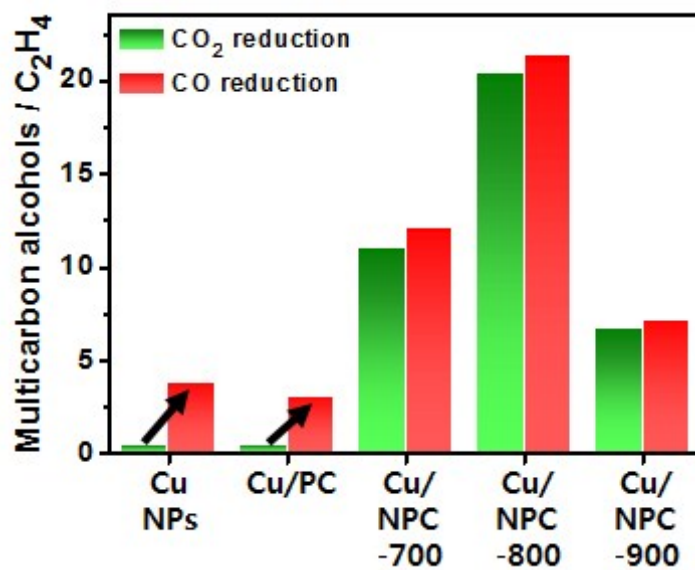

**Fig. S14** Comparison of the relative ratio of Faradaic efficiencies of multicarbon alcohols to C<sub>2</sub>H<sub>4</sub> for Cu catalysts in CO<sub>2</sub> reduction and CO reduction.

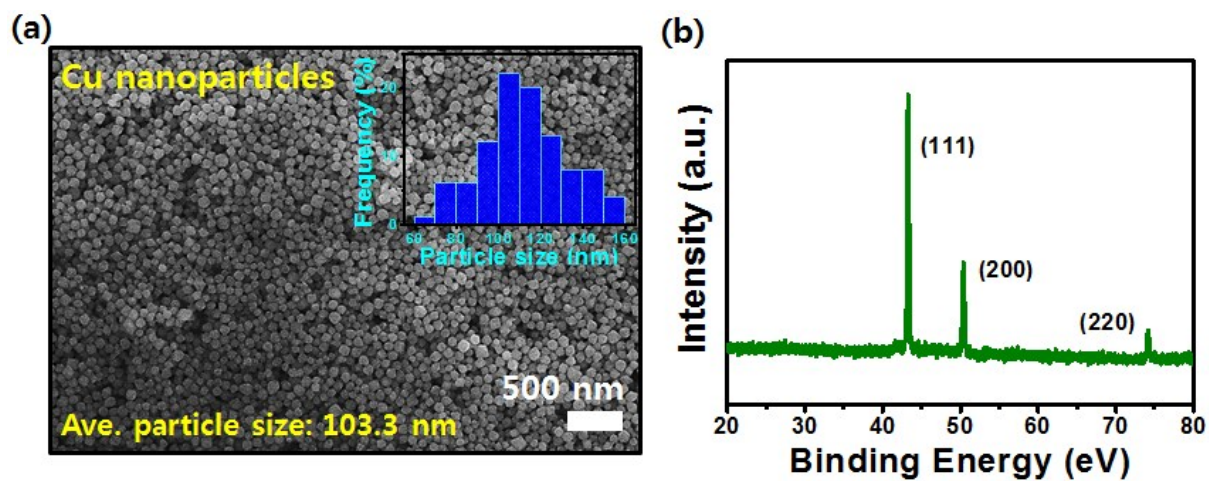

**Fig. S15** (a) SEM image with particle size distribution of Cu nanoparticles and (b) the corresponding XRD patterns.



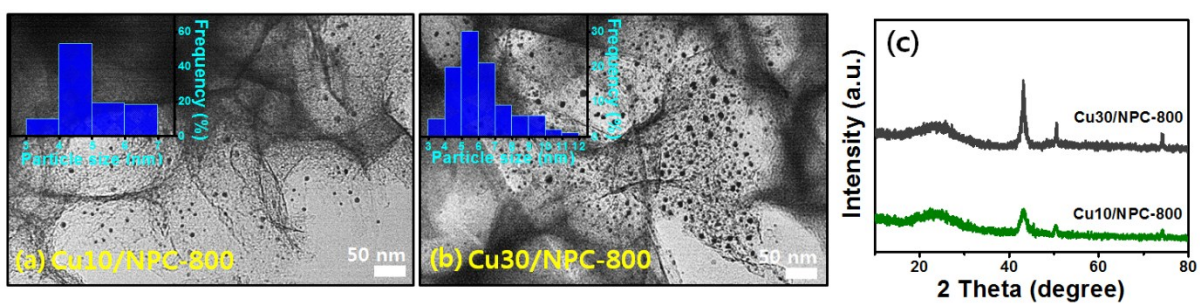

**Fig. S16** TEM image with particle size distribution of (a) Cu<sub>10</sub>/NPC-800 and (b) Cu<sub>30</sub>/NPC-800 and (c) the corresponding XRD patterns.

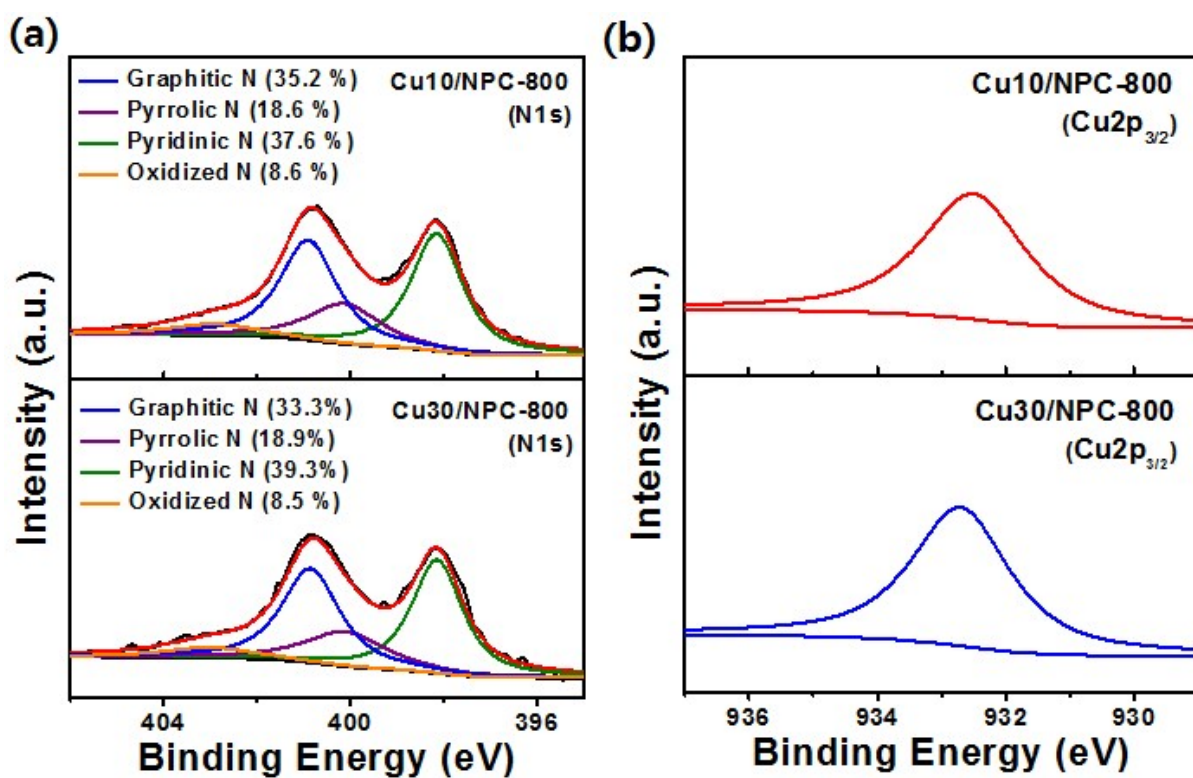

**Fig. S17** (a) High resolution N 1s and (b) Cu 2p<sub>3/2</sub> spectra of Cu10/NPC-800 and Cu30/NPC-800.

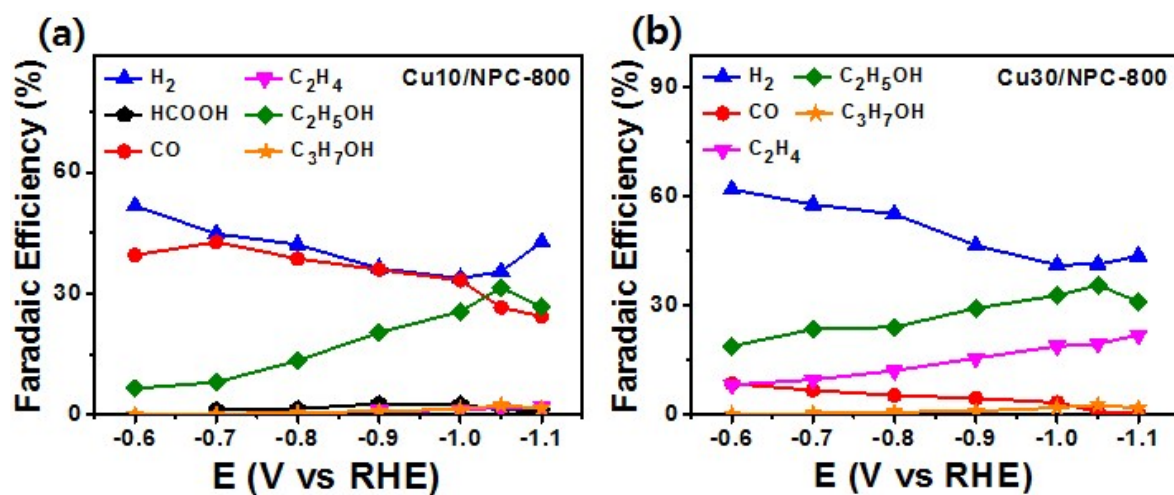

**Fig. S18** Faradaic efficiencies of liquid and gaseous products for CO<sub>2</sub> reduction in CO<sub>2</sub>-saturated 0.2 M KHCO<sub>3</sub> aqueous solution on (a) Cu10/NPC-800 and (b) Cu30/NPC-800.
